# Supplementary material for: Gradually Guiding Nursing Students through Their Capstone Course: Registered Nurse Preceptors Share Their Experiences
Source: Hindawi journal article supplement (doi:10.1155/2011/645125), 2011-01-01
Supplement: f1 [file 645125.f1.pdf]

## Appendix A: Demographic Information

Name: \_\_\_\_\_

\_\_\_\_\_

Gender: \_\_\_\_\_

Highest level of Education: \_\_\_\_\_ Date of graduation from nursing  
school: \_\_\_\_\_

Number of years as an RN: \_\_\_\_\_ Current Job

Title: \_\_\_\_\_

Nursing unit where you

work: \_\_\_\_\_

Name of hospital where you

work: \_\_\_\_\_

Length of time in current position: \_\_\_\_\_ Length of time in clinical  
specialty: \_\_\_\_\_

List all clinical

certifications:\_\_\_\_\_

Have you participated in clinical nursing research studies before? Yes \_\_\_\_\_ No

\_\_\_\_\_

How many times have you been a preceptor in the KU Professional Practicum  
program?\_\_\_\_\_

Have you served as a preceptor for other capstone nursing students? Yes \_\_\_\_\_

No\_\_\_\_\_

How many times have you been a preceptor for a new nursing  
employee?\_\_\_\_\_

What training did you receive prior to becoming a preceptor (please list type of class,  
number of hours, and approximate dates or  
none)?\_\_\_\_\_
